# Supplementary material for: Management of Outpatient Hemodialysis During the COVID-19 Pandemic: Recommendations From the Canadian Society of Nephrology COVID-19 Rapid Response Team
Source: PubMed Central journal article supplement — Can J Kidney Health Dis. 2020 Sep 11;7:2054358120938564. doi: 10.1177/2054358120938564 (PMC7488889; doi:10.1177/2054358120938564), 2020-09-11
Supplement: Appendix.pdf [file Appendix.pdf]

## Appendix –Supplementary Materials

**Table 4: ALGORITHM FOR DETERMINING DIALYSIS TREATMENT FREQUENCY PRIORITY**

|                   |                                                                                                                                                                                                                                                                                                                                                                                       |                                                                                                                                                                                                                                                   |
|-------------------|---------------------------------------------------------------------------------------------------------------------------------------------------------------------------------------------------------------------------------------------------------------------------------------------------------------------------------------------------------------------------------------|---------------------------------------------------------------------------------------------------------------------------------------------------------------------------------------------------------------------------------------------------|
| <b>PRIORITY A</b> | <ul style="list-style-type: none"> <li>• Average interdialytic weight gain <math>\geq</math> <u>2 kg</u> during the <u>last month</u></li> </ul> <p>OR</p> <ul style="list-style-type: none"> <li>• Cannot miss based on opinion of treating physician<br/>e.g. inability to tolerate small weight gains due to tenuous cardiac status, non-adherent with Kayexalate, etc.</li> </ul> | Cannot miss any treatments safely                                                                                                                                                                                                                 |
| <b>PRIORITY B</b> | <ul style="list-style-type: none"> <li>• <u>2 or more</u> K values <math>&gt;5.5</math> mEq/L during the <u>last 3 months</u></li> </ul>                                                                                                                                                                                                                                              | <p><b>Ideally should not miss any treatments</b></p> <p>If must miss one treatment, use sodium polystyrene sulfonate (Kayexalate) 30 g daily until next treatment, or another approved potassium-binder.</p>                                      |
| <b>PRIORITY C</b> | <ul style="list-style-type: none"> <li>• one K value <math>&gt;5.5</math> mEq/L in the <u>last 3 months</u></li> </ul>                                                                                                                                                                                                                                                                | <p>*Can temporarily miss one treatment in a week if absolutely necessary.</p> <p>Prescribe sodium polystyrene sulfonate (Kayexalate) 15 g daily until next treatment or another approved potassium-binder.</p>                                    |
| <b>PRIORITY D</b> | <ul style="list-style-type: none"> <li>• All others</li> </ul>                                                                                                                                                                                                                                                                                                                        | <p>*Can temporarily miss one treatment in a week if absolutely necessary</p> <p>The need for Kayexalate should be determined by the treating physician based on knowledge of the patient’s average K, adherence, and residual kidney function</p> |

*This algorithm was developed for use with Nephrocare electronic medical record (EMR), but could also be applied with other EMRs.*

\*Patient should not miss two consecutive treatments, *and if possible, no more than two treatments in 6 weeks.*

\*Patients with serious dialysis access related issues with decreased blood flows and potential pre-existing underdialysis should NOT miss any treatments.

\*Treating physician has the discretion to override this algorithm for individual patients.

**Table 5: CRITERIA for initiating and maintaining TWICE WEEKLY HEMODIALYSIS treatment** <sup>1,2,3</sup>

|                                                                                                                                                                                                                                                                                                                                                                                                                                                                                                                                                                                                                                                                                                                                                                                           |
|-------------------------------------------------------------------------------------------------------------------------------------------------------------------------------------------------------------------------------------------------------------------------------------------------------------------------------------------------------------------------------------------------------------------------------------------------------------------------------------------------------------------------------------------------------------------------------------------------------------------------------------------------------------------------------------------------------------------------------------------------------------------------------------------|
| <ul style="list-style-type: none"> <li>▪ Adequate KRU of <math>&gt;3</math> ml/min/1.73m<sup>2</sup> (requires prior 24-hour urine collection available). KRU = residual urea clearance<sup>1</sup></li> <li>▪ Adequate residual urine output <math>&gt;600</math> ml/day</li> <li>▪ Fluid gain <math>&lt;2.5</math>kg between two consecutive HD treatments, or <math>&lt;5\%</math> of the ideal dry weight</li> <li>▪ No clinically significant fluid overload</li> <li>▪ Suitable body size relative to residual kidney function and not in hypercatabolic state</li> <li>▪ <math>K &lt;5.5</math> mEq/L</li> <li>▪ Good nutritional status</li> <li>▪ Infrequent hospitalization and easily manageable comorbid conditions including cardiovascular or pulmonary symptoms</li> </ul> |
|-------------------------------------------------------------------------------------------------------------------------------------------------------------------------------------------------------------------------------------------------------------------------------------------------------------------------------------------------------------------------------------------------------------------------------------------------------------------------------------------------------------------------------------------------------------------------------------------------------------------------------------------------------------------------------------------------------------------------------------------------------------------------------------------|
